# Supplementary material for: Epidemiology of Severe Fever with Thrombocytopenia Syndrome in Dogs and Cats in Taiwan
Source: MDPI journal article supplement (doi:10.3390/v15122338), 2023-11-28
Supplement: s1 [file s1]

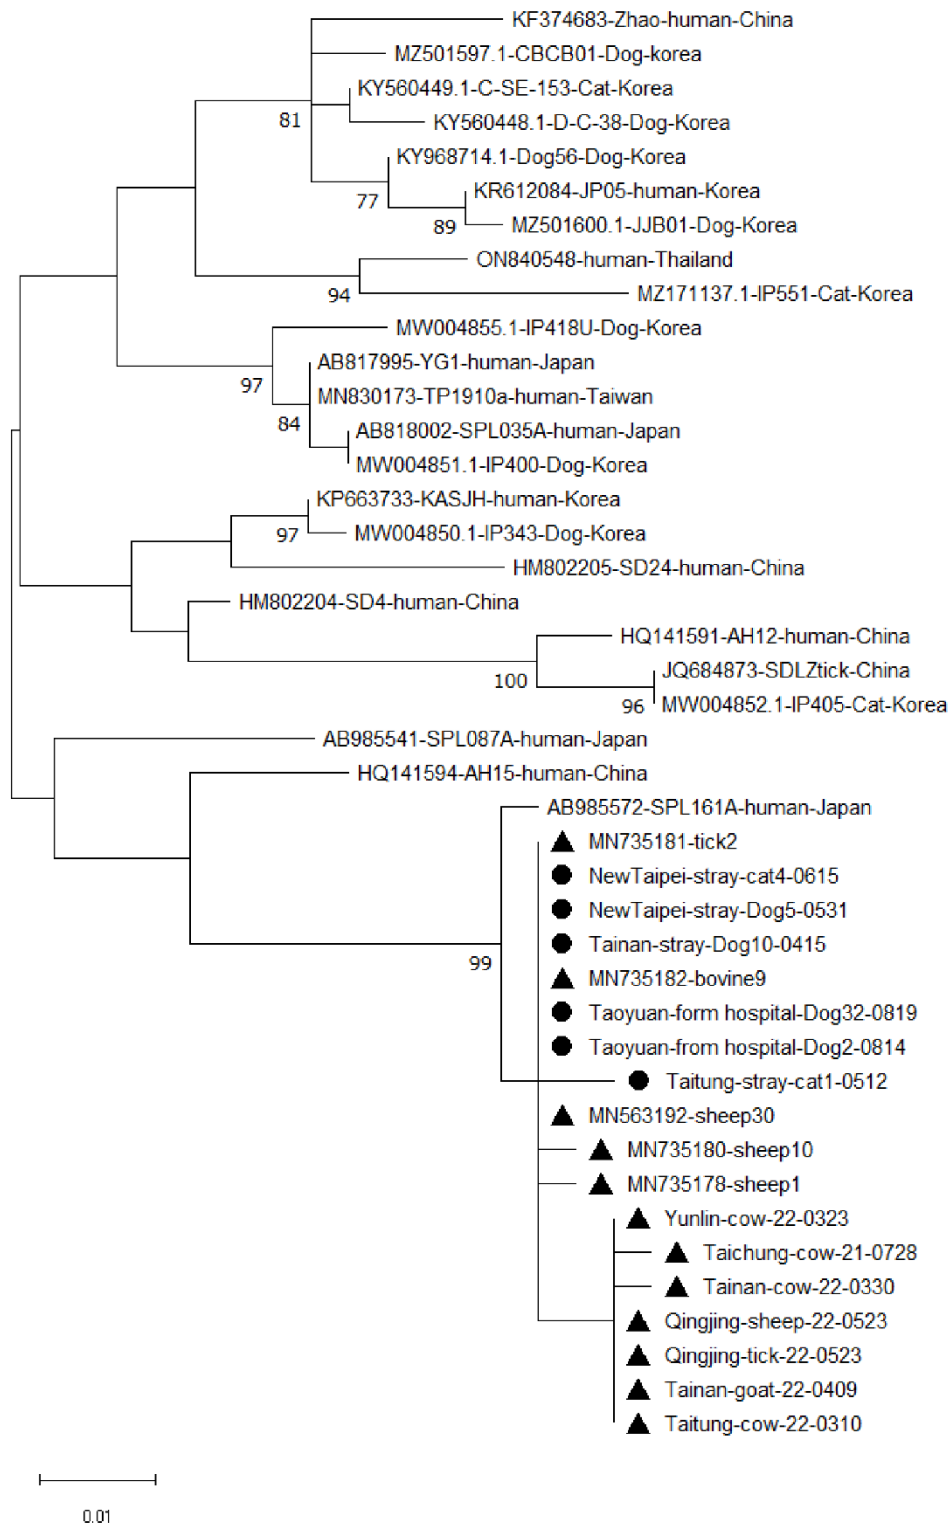

**Supplementary Figure S1. Phylogenetic analysis of the partial NP of SFTSV identified in dogs and cats in Taiwan.** In total, the sequences from six samples with higher RNA loads obtained from dogs and cats (indicated by a black circle) were further analyzed. Notably, these strains were clustered together with those amplified from ruminants and ticks in Taiwan (indicated by a triangle). Representative viral strains, along with their accession numbers and the host and country of isolation, were included. The phylogenetic analysis utilized the maximum-likelihood method, based on the Kimura 2-parameter model, with 1000 bootstrap replicates; bootstraps higher than 75 were shown. The percentage of trees in which associated taxa clustered is indicated next to the branches, and the scale bar represents nucleotide substitutions per position.
